# Supplementary material for: Thermosensitive hydrogels composed of cyclodextrin pseudorotaxanes. Role of [3]pseudorotaxane in the gel formation
Source: Royal Society of Chemistry journal article supplement (doi:10.1039/b911667b), 2009-01-01
Supplement: b911667b.pdf [file b911667b.pdf]

*Electronic Supplementary Information of*

# **Thermosensitive Hydrogels Composed of Cyclodextrin Pseudorotaxanes. Role of [3]Pseudorotaxane in the Gel Formation**

Toshiaki Taira, Yuji Suzaki, Kohtaro Osakada\*

Chemical Resources Laboratory R1-3, Tokyo Institute of Technology, 4259 Nagatsuta,  
Midoriku, Yokohama 226-8503, Japan.

Fax: +81-45-924-5224; Tel: +81-45-924-5224

E-mail: kosakada@res.titech.ac.jp

## **Experimental Section**

**General.**  $\text{Cl}(\text{CH}_2)_{10}\text{OC}_6\text{H}_3\text{-3,5-(OMe)}_2$  was prepared by the literature method.<sup>1</sup> Other chemicals were commercially available. NMR spectra ( $^1\text{H}$ ,  $^{13}\text{C}\{^1\text{H}\}$ ) were recorded on Varian MERCURY300 spectrometer, JEOL EX-400 spectrometer or JEOL JNM La-500 spectrometer.  $^{13}\text{C}$  CP/MAS NMR spectra were recorded on JEOL JNM La-500. Fast atom bombardment mass spectra (FABMS) were obtained from a JEOL JMS-700 (matrix, (2-nitrophenyl)(n-octyl) ether (NPOE) or 3-nitrobenzyl alcohol (NBA)) spectrometer. Matrix assisted laser desorption ionization time of flight mass spectra (MALDI-TOFMS) were obtained from a Shimadzu AXIMA-CFR Plus (matrix, 2-hydroxy-5-methoxybenzoic acid (super DHB); cationization agent, silver trifluoroacetate) spectrometer. Elemental analyses were carried out with a Yanaco MT-5 CHN autorecorder. The absorption spectrum were recorded using JASCO V-530 UV/Vis spectrometer. Before measuring, the samples were stored at an adequate temperature using a JASCO EHC-477 peltire-type thermostated cell holder.

**$\text{Cl}(\text{CH}_2)_8\text{OC}_6\text{H}_3\text{-3,5-(OMe)}_2$ :** A solution of 3,5-dimethoxyphenol (8.0 g, 52 mmol) and NaOH (3.2 g, 80 mmol) in DMF (35 mL) was stirred for 8 h at room temperature, followed by the addition of 1,8-dichlorooctane (18.0 mL, 95 mmol). The mixture was stirred for 24 h at 110 °C. The reaction was quenched by addition of 1 M HCl, and the organic product was extracted with  $\text{CH}_2\text{Cl}_2$  and dried over  $\text{MgSO}_4$ . Evaporation of the solvent give a crude product which was

purified by SiO<sub>2</sub> column chromatography (hexane/CH<sub>2</sub>Cl<sub>2</sub> = 5/1). Further purification of the product by recrystallization from solution at 3 °C and washing with cold hexane yield Cl(CH<sub>2</sub>)<sub>8</sub>C<sub>6</sub>H<sub>3</sub>-3,5-(OMe)<sub>2</sub> as white solid (1.67 g, 5.6 mmol, 11%). <sup>1</sup>H NMR (300 MHz, CDCl<sub>3</sub>): δ 1.24-1.57 (8H, CH<sub>2</sub>), 1.69-1.85 (4H, CH<sub>2</sub>), 3.54 (t, 2H, *J* = 7 Hz, ClCH<sub>2</sub>), 3.77 (s, 6H, OCH<sub>3</sub>), 3.91 (t, 2H, *J* = 6 Hz, OCH<sub>2</sub>), 6.08 (3H, *ortho*-, *para*-C<sub>6</sub>H<sub>3</sub>). <sup>13</sup>C{<sup>1</sup>H} NMR (75.5 MHz, CDCl<sub>3</sub>): δ 25.8 (CH<sub>2</sub>), 26.7 (CH<sub>2</sub>), 28.7 (CH<sub>2</sub>), 29.0 (CH<sub>2</sub>), 29.1 (CH<sub>2</sub>), 32.5 (CH<sub>2</sub>), 44.9 (ClCH<sub>2</sub>), 55.1 (OCH<sub>3</sub>), 67.7 (OCH<sub>2</sub>), 92.6 (C<sub>6</sub>H<sub>3</sub>), 93.1 (C<sub>6</sub>H<sub>3</sub>), 160.9 (C<sub>6</sub>H<sub>3</sub>), 161.3 (C<sub>6</sub>H<sub>3</sub>). Anal. calcd. for C<sub>16</sub>H<sub>25</sub>ClO<sub>3</sub>: C, 63.88; H, 8.38; Cl, 11.79. Found: C, 63.59; H, 8.62; Cl, 12.08. FABMS: *m/z* = 301 [M+H]<sup>+</sup>.

**Br(CH<sub>2</sub>)<sub>12</sub>OC<sub>6</sub>H<sub>3</sub>-3,5-(OMe)<sub>2</sub>**: An acetone (30 mL) solution containing 3,5-dimethoxyphenol (4.1 g, 27 mmol), K<sub>2</sub>CO<sub>3</sub> (3.4 g, 25 mmol) and 1,12-dibromododecane (17 g, 52 mmol) was refluxed for 21 h. Evaporation of the solvent give a crude product which was purified by SiO<sub>2</sub> column chromatography (hexane/CH<sub>2</sub>Cl<sub>2</sub> = 2/1) to yields Br(CH<sub>2</sub>)<sub>12</sub>OC<sub>6</sub>H<sub>3</sub>-3,5-(OMe)<sub>2</sub> as white solid (6.0 g, 15 mmol, 56%). <sup>1</sup>H NMR (300 MHz, CDCl<sub>3</sub>): δ 1.19–1.51 (16H, CH<sub>2</sub>), 1.76 (m, 2H, OCH<sub>2</sub>CH<sub>2</sub>), 1.85 (m, 2H, BrCH<sub>2</sub>CH<sub>2</sub>), 3.40 (t, 2H, *J* = 7 Hz, ClCH<sub>2</sub>), 3.76 (s, 6H, OCH<sub>3</sub>), 3.91 (t, 2H, *J* = 6 Hz, OCH<sub>2</sub>), 6.08 (3H, *ortho*-, *para*-C<sub>6</sub>H<sub>3</sub>). <sup>13</sup>C{<sup>1</sup>H} NMR (75.5 MHz, CDCl<sub>3</sub>): δ 26.0 (CH<sub>2</sub>), 28.1 (CH<sub>2</sub>), 28.7 (CH<sub>2</sub>), 29.2 (2C, CH<sub>2</sub>), 29.3 (CH<sub>2</sub>), 29.4 (2C, CH<sub>2</sub>), 29.5 (2C, CH<sub>2</sub>), 32.8 (CH<sub>2</sub>), 34.0 (BrCH<sub>2</sub>), 55.2 (OCH<sub>3</sub>), 67.9 (OCH<sub>2</sub>), 92.7 (C<sub>6</sub>H<sub>3</sub>), 93.2 (C<sub>6</sub>H<sub>3</sub>), 161.0 (C<sub>6</sub>H<sub>3</sub>), 161.4 (C<sub>6</sub>H<sub>3</sub>). Anal. calcd. for C<sub>20</sub>H<sub>33</sub>BrO<sub>3</sub>+0.25(H<sub>2</sub>O): C, 59.18; H, 8.32; Br, 19.69. Found: C, 59.43; H, 8.39; Br, 19.48. FABMS: *m/z* = 401 [M+H]<sup>+</sup>.

**[py-*N*-(CH<sub>2</sub>)<sub>8</sub>OC<sub>6</sub>H<sub>3</sub>-3,5-(OMe)<sub>2</sub>]<sup>+</sup>(Cl) (1a)**: A DMF solution (5 mL) of Cl(CH<sub>2</sub>)<sub>8</sub>OC<sub>6</sub>H<sub>3</sub>-3,5-(OMe)<sub>2</sub> (1.0 g, 3.3 mmol) and pyridine (1.3 mL, 16 mmol) was stirred at 110 °C for 27 h. The solution was poured into diethyl ether (200 mL). The precipitate was collected by filtration and washed with diethyl ether to yield **1a** as a white solid (1.27 g, 3.3 mmol, quant.). <sup>1</sup>H NMR (300 MHz, CDCl<sub>3</sub>): δ 1.18–1.39 (8H, CH<sub>2</sub>), 1.62 (m, 2H, CH<sub>2</sub>), 1.95 (m, 2H, CH<sub>2</sub>), 3.66 (s, 6H, OCH<sub>3</sub>), 3.78 (t, 2H, *J* = 6 Hz, OCH<sub>2</sub>), 4.88 (t, 2H, *J* = 7 Hz, NCH<sub>2</sub>), 5.96 (3H, *ortho*-, *para*-C<sub>6</sub>H<sub>3</sub>), 8.07 (t, 2H, *J* = 7 Hz, C<sub>5</sub>H<sub>5</sub>N), 8.42 (t, 1H, *J* = 7 Hz, C<sub>5</sub>H<sub>5</sub>N), 9.44 (d, 2H, *J* = 7 Hz, C<sub>5</sub>H<sub>5</sub>N). <sup>13</sup>C{<sup>1</sup>H} NMR (75.5 MHz, CDCl<sub>3</sub>): δ 25.6 (CH<sub>2</sub>), 25.7 (CH<sub>2</sub>), 28.7 (CH<sub>2</sub>), 28.8 (CH<sub>2</sub>), 28.9 (CH<sub>2</sub>), 31.7 (CH<sub>2</sub>), 55.1 (OCH<sub>3</sub>), 61.7 (NCH<sub>2</sub>), 67.6 (OCH<sub>2</sub>), 92.6 (*ortho*-C<sub>6</sub>H<sub>3</sub>), 93.1 (*para*-C<sub>6</sub>H<sub>3</sub>), 128.3 (C<sub>5</sub>H<sub>5</sub>N), 144.9 (C<sub>5</sub>H<sub>5</sub>N), 145.0 (C<sub>5</sub>H<sub>5</sub>N), 160.7 (*meta*-C<sub>6</sub>H<sub>3</sub>), 161.2 (*ipso*-C<sub>6</sub>H<sub>3</sub>). Anal. calcd. for C<sub>21</sub>H<sub>30</sub>ClNO<sub>3</sub>+(H<sub>2</sub>O): C, 63.38; H, 8.11; N, 3.52; Cl, 8.91. Found: C, 63.45; H, 8.21; N, 3.59; Cl, 9.31. FABMS: *m/z* = 344 [M-Cl]<sup>+</sup>.

**[py-*N*-(CH<sub>2</sub>)<sub>10</sub>OC<sub>6</sub>H<sub>3</sub>-3,5-(OMe)<sub>2</sub>]<sup>+</sup>(Cl<sup>-</sup>) (1b):** A DMF solution (10 mL) of Cl(CH<sub>2</sub>)<sub>10</sub>OC<sub>6</sub>H<sub>3</sub>-3,5-(OMe)<sub>2</sub> (2.1 g, 6.4 mmol) and pyridine (2.5 mL, 31 mmol) was stirred at 110 °C for 24 h. The solution was poured into diethyl ether (200 mL). The precipitate was collected by filtration and wash with diethyl ether to yield **1b** as a white solid (2.0 g, 4.9 mmol, 77%). <sup>1</sup>H NMR (300 MHz, DMSO-*d*<sub>6</sub>): δ 1.20–1.42 (12H, CH<sub>2</sub>), 1.65 (m, 2H, CH<sub>2</sub>), 1.89 (m, 2H, CH<sub>2</sub>), 3.68 (s, 6H, OCH<sub>3</sub>), 3.88 (t, 2H, *J* = 6 Hz, OCH<sub>2</sub>), 4.57 (t, 2H, *J* = 7 Hz, NCH<sub>2</sub>), 6.05 (3H, *ortho*-, *para*-C<sub>6</sub>H<sub>3</sub>), 8.14 (t, 2H, *J* = 8 Hz, C<sub>5</sub>H<sub>5</sub>N), 8.59 (t, 1H, *J* = 8 Hz, C<sub>5</sub>H<sub>5</sub>N), 9.08 (d, 2H, *J* = 6 Hz, C<sub>5</sub>H<sub>5</sub>N). <sup>13</sup>C {<sup>1</sup>H} NMR (75.5 MHz, DMSO-*d*<sub>6</sub>): δ 25.5 (CH<sub>2</sub>), 25.6 (CH<sub>2</sub>), 28.5 (CH<sub>2</sub>), 28.7 (CH<sub>2</sub>), 28.8 (2CH<sub>2</sub>), 28.9 (CH<sub>2</sub>), 30.9 (CH<sub>2</sub>), 55.2 (OCH<sub>3</sub>), 60.6 (NCH<sub>2</sub>), 67.4 (OCH<sub>2</sub>), 92.7 (*ortho*-C<sub>6</sub>H<sub>3</sub>), 93.2 (*para*-C<sub>6</sub>H<sub>3</sub>), 128.1 (C<sub>5</sub>H<sub>5</sub>N), 144.9 (C<sub>5</sub>H<sub>5</sub>N), 145.5 (C<sub>5</sub>H<sub>5</sub>N), 160.6 (*meta*-C<sub>6</sub>H<sub>3</sub>), 161.2 (*ipso*-C<sub>6</sub>H<sub>3</sub>). Anal. calcd. for C<sub>23</sub>H<sub>34</sub>ClNO<sub>3</sub>+1.3(H<sub>2</sub>O): C, 64.04; H, 8.55; N, 3.25. Found: C, 63.95; H, 8.71; N, 3.32. FABMS: *m/z* = 372 [M-Cl]<sup>+</sup>.

**[py-*N*-(CH<sub>2</sub>)<sub>12</sub>OC<sub>6</sub>H<sub>3</sub>-3,5-(OMe)<sub>2</sub>]<sup>+</sup>(Br<sup>-</sup>) (1c):** A DMF solution (20 mL) of Br(CH<sub>2</sub>)<sub>12</sub>OC<sub>6</sub>H<sub>3</sub>-3,5-(OMe)<sub>2</sub> (3.0 g, 7.5 mmol) and pyridine (3.0 mL, 39 mmol) was stirred at 110 °C for 16 h. The solution was poured into diethyl ether (300 mL). The precipitate was collected by filtration and wash with diethyl ether to yield **1c** as a white solid (3.5 g, 7.3 mmol, 97%). <sup>1</sup>H NMR (300 MHz, CDCl<sub>3</sub>): δ 1.11–1.40 (16H, CH<sub>2</sub>), 1.65 (m, 2H, CH<sub>2</sub>), 1.97 (m, 2H, CH<sub>2</sub>), 3.67 (s, 6H, OCH<sub>3</sub>), 3.81 (t, 2H, *J* = 6 Hz, OCH<sub>2</sub>), 4.91 (t, 2H, *J* = 7 Hz, NCH<sub>2</sub>), 5.97 (3H, *ortho*-, *para*-C<sub>6</sub>H<sub>3</sub>), 8.09 (t, 2H, *J* = 7 Hz, C<sub>5</sub>H<sub>5</sub>N), 8.45 (t, 1H, *J* = 7 Hz, C<sub>5</sub>H<sub>5</sub>N), 9.50 (d, 2H, *J* = 6 Hz, C<sub>5</sub>H<sub>5</sub>N). <sup>13</sup>C {<sup>1</sup>H} NMR (75.5 MHz, CDCl<sub>3</sub>): δ 25.7 (CH<sub>2</sub>), 25.8 (CH<sub>2</sub>), 28.8 (CH<sub>2</sub>), 28.9 (CH<sub>2</sub>), 29.1 (2C, CH<sub>2</sub>), 29.2 (3C, CH<sub>2</sub>), 31.8 (CH<sub>2</sub>), 55.1 (OCH<sub>3</sub>), 61.7 (NCH<sub>2</sub>), 67.8 (OCH<sub>2</sub>), 92.5 (*ortho*-C<sub>6</sub>H<sub>3</sub>), 93.1 (*para*-C<sub>6</sub>H<sub>3</sub>), 128.3 (C<sub>5</sub>H<sub>5</sub>N), 144.9 (2C, C<sub>5</sub>H<sub>5</sub>N), 160.8 (*meta*-C<sub>6</sub>H<sub>3</sub>), 161.2 (*ipso*-C<sub>6</sub>H<sub>3</sub>). Anal. calcd. for C<sub>25</sub>H<sub>38</sub>BrNO<sub>3</sub>+0.25(H<sub>2</sub>O): C, 61.91; H, 8.00; N, 2.89; Br, 16.48. Found: C, 61.82; H, 8.11; N, 2.93; Br, 16.56. FABMS: *m/z* = 400 [M-Br]<sup>+</sup>.

**Xerogel of 1b and α-CD:** A H<sub>2</sub>O solution (5 mL) of **1b** (220 mg, 0.5 mmol) and α-CD (1.0 g, 1.0 mmol) was stirred at 70 °C for 20 min. The solution was cooled to 4 °C for 32 h gave hydrogel. Addition of acetone (5 mL) to the hydrogel formed white precipitate. The precipitate was collected by filtration and washed with acetone (30 ml) to yield xerogel as a white solid. The xerogel was also obtained by slow evaporation of the hydrogel.

**The reaction of urea with hydrogel containing 1b and α-CD:** Heating of an aqueous solution of **1b** (14 mg, 0.04 mmol) and α-CD (68 mg, 0.07 mmol) at 60 °C and subsequent cooling to room temperature gave hydrogel. Addition of urea (64 mg, 1.1 mmol) to the hydrogel and heating at 60 °C. The solution was cooled to room temperature to gave transparent solution.

### 1. $^{13}\text{C}$ CP/MAS NMR spectra of Xerogel of **1b** and $\alpha$ -CD

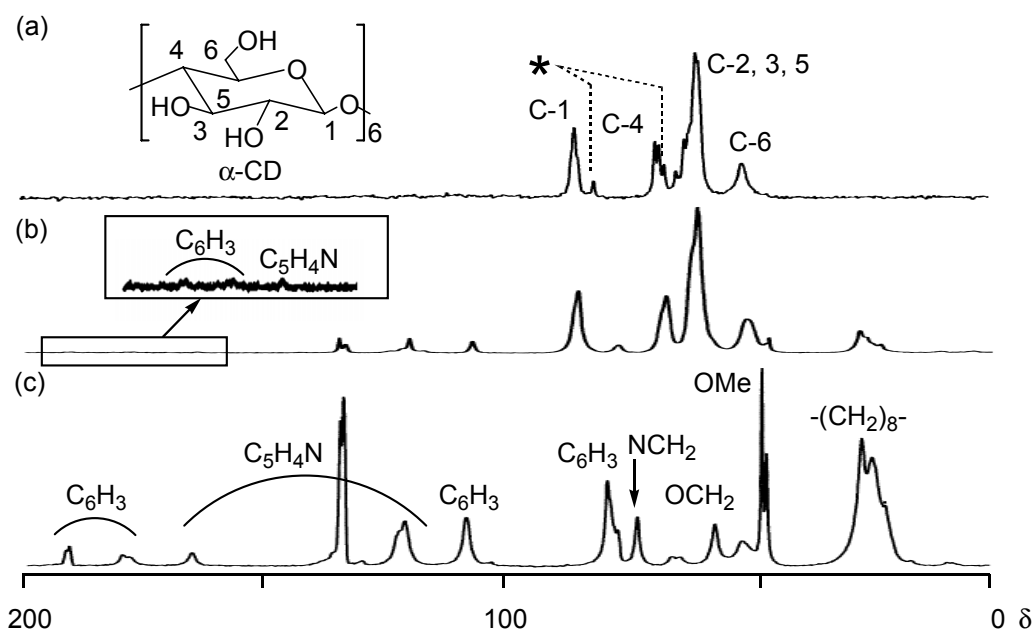

Figure S1.  $^{13}\text{C}$  CP/MAS NMR spectra (100 MHz, RT) of (a)  $\alpha$ -CD, (b) xerogel of **1b** and  $\alpha$ -CD, and (c) **1b**. Peaks with an asterisk are assigned to C-1 and C-4 with a conformationally strained glycoside linkage.

## 2. 2D ROESY $^1\text{H}$ NMR Spectrum of **1b** and $\alpha\text{-CD}$

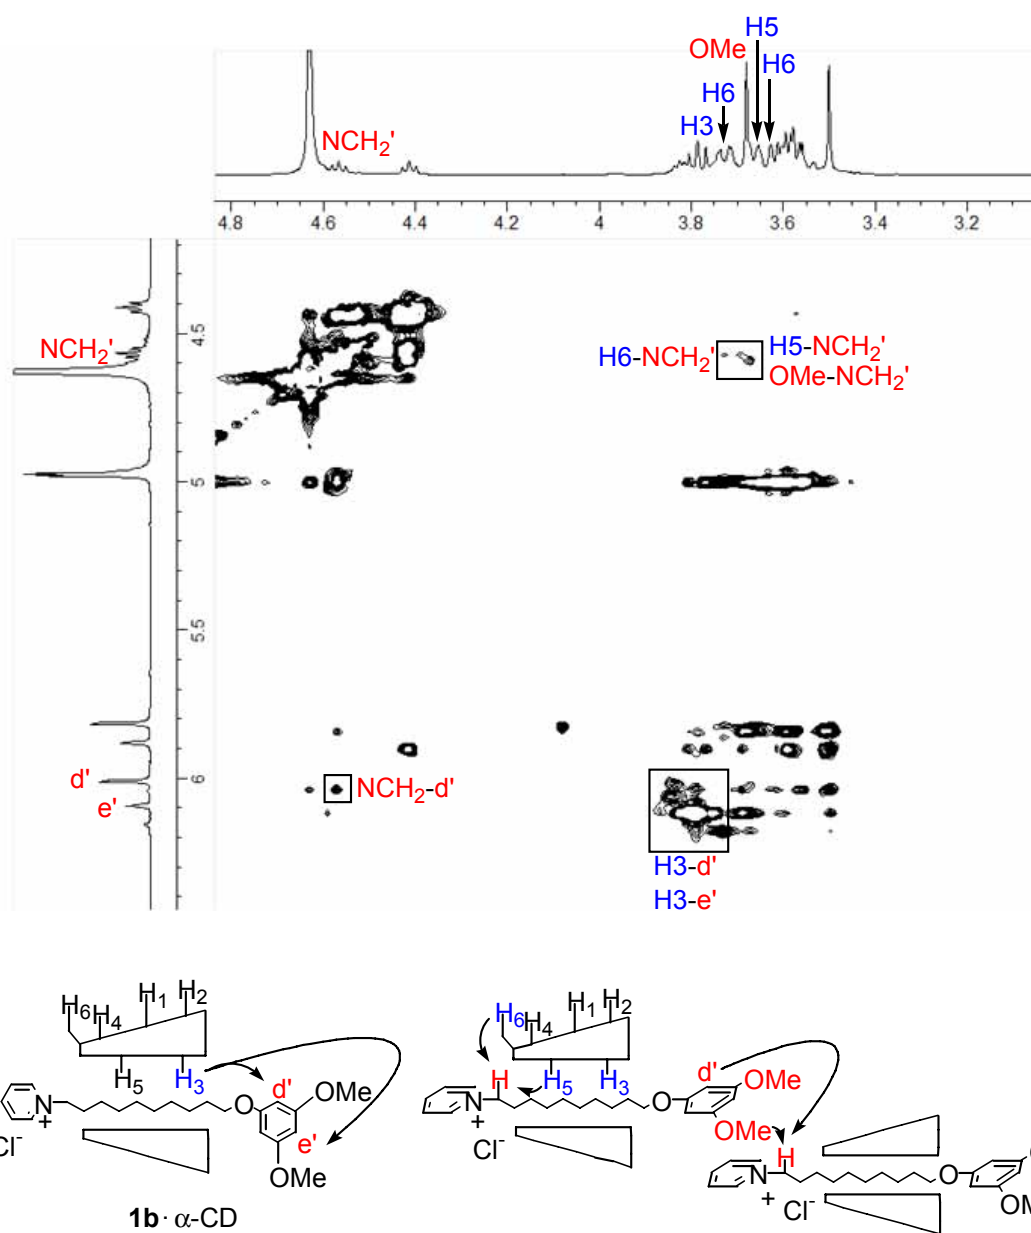

Figure S2. 2D ROESY  $^1\text{H}$  NMR spectrum (500 MHz, 30  $^\circ\text{C}$ ) of **1b** (100 mM) and  $\alpha\text{-CD}$  (50 mM) in  $\text{D}_2\text{O}$  (mixing time = 400 ms).

### Reference

- [1] Y. Suzaki, T. Taira and K. Osakada, *Dalton Trans.*, 2006, 5345.
